# Supplementary material for: The coordination of lanthanide ions with picolinamide. The influence of different anions
Source: Royal Society of Chemistry journal article supplement (doi:10.1039/c4ce00606b), 2014-01-01
Supplement: c4ce00606b1.pdf [file c4ce00606b1.pdf]

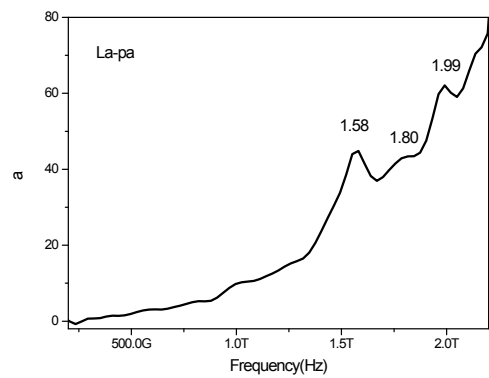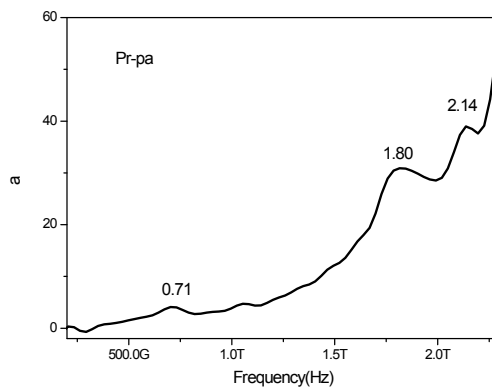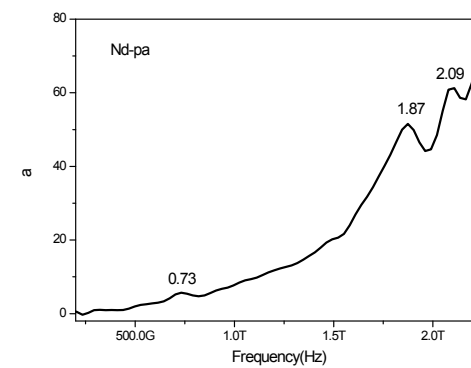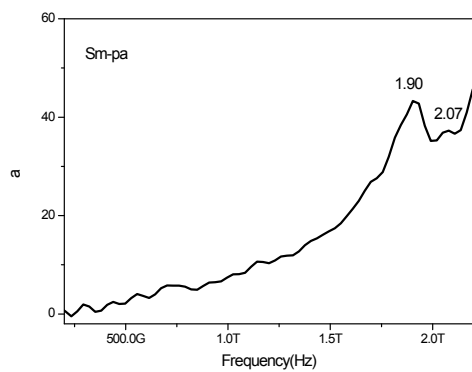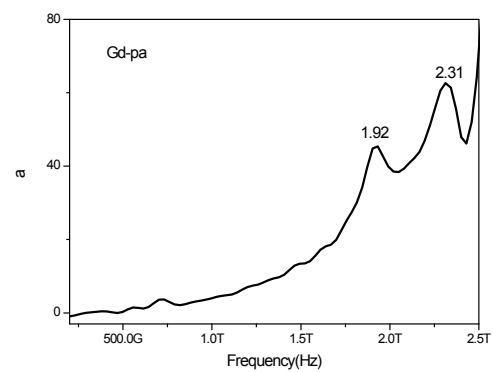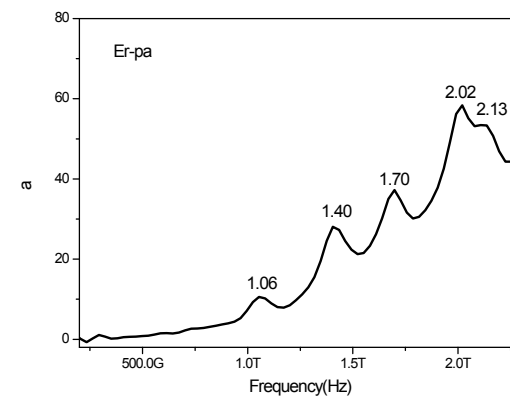

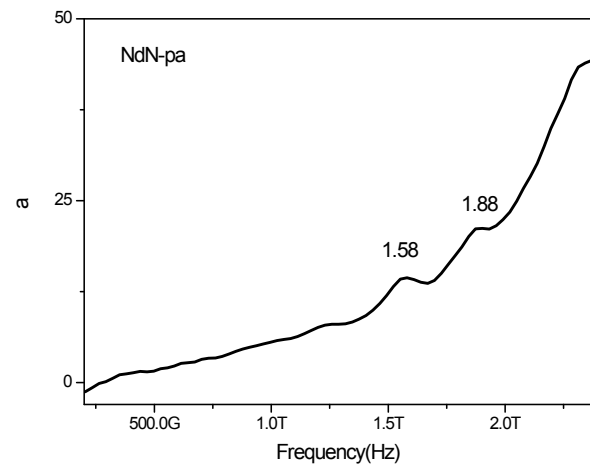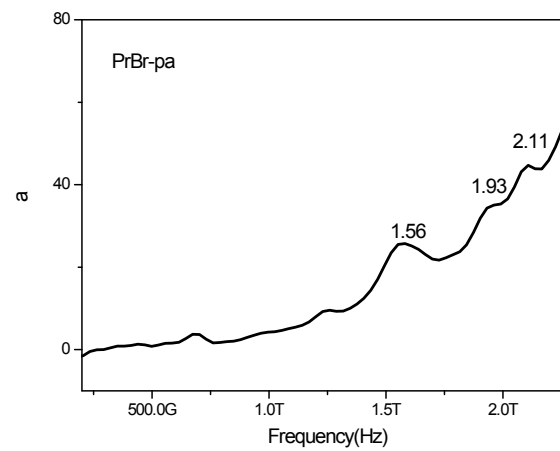

**Fig. S1.** The THz spectra of eight lanthanide-pa complexes

Table S1 The selected bond lengths (Å) and bond angles (°) in the lanthanide-pa complexes

| La-pa      |          | Pr-pa      |          | Nd-pa      |            |
|------------|----------|------------|----------|------------|------------|
| La1–O1     | 2.451(4) | Pr1–O2     | 2.424(3) | Nd1–O1     | 2.4043(19) |
| La1–O2     | 2.471(4) | Pr1–O1     | 2.436(3) | Nd1–O2     | 2.426(2)   |
| La1–O5     | 2.513(4) | Pr1–O4     | 2.481(3) | Nd1–O6     | 2.4614(19) |
| La1–O4     | 2.530(4) | Pr1–O6     | 2.501(3) | Nd1–O3     | 2.475(2)   |
| La1–O3     | 2.558(4) | Pr1–O7     | 2.518(3) | Nd1–O5     | 2.500(2)   |
| La1–O7     | 2.560(4) | Pr1–O3     | 2.537(3) | Nd1–O7     | 2.5121(19) |
| La1–O6     | 2.573(4) | Pr1–O5     | 2.542(3) | Nd1–O4     | 2.531(2)   |
| La1–N1     | 2.717(5) | Pr1–N3     | 2.671(3) | Nd1–N1     | 2.657(2)   |
| La1–N3     | 2.760(5) | Pr1–N1     | 2.702(4) | Nd1–N3     | 2.683(2)   |
| C11–N3–C7  | 118.0(5) | C5–N1–C1   | 117.1(4) | C11–N3–C7  | 117.3(2)   |
| C5–N1–C1   | 117.4(5) | C7–N3–C11  | 117.8(4) | C5–N1–C1   | 117.4(2)   |
| O1–C6–N2   | 121.7(6) | O2–C12–N4  | 121.4(4) | N1–C5–C4   | 123.1(3)   |
| O1–C6–C1   | 118.9(5) | O2–C12–C7  | 118.5(4) | O2–C12–N4  | 121.8(3)   |
| N2–C6–C1   | 119.4(5) | N4–C12–C7  | 120.1(4) | O2–C12–C7  | 118.7(2)   |
| N1–C1–C2   | 122.9(5) | O1–C6–N2   | 122.3(4) | N4–C12–C7  | 119.4(2)   |
| N1–C1–C6   | 112.9(5) | O1–C6–C1   | 119.0(4) | N3–C7–C8   | 122.8(3)   |
| C2–C1–C6   | 124.2(5) | N2–C6–C1   | 118.8(4) | N3–C7–C12  | 113.3(2)   |
| O2–C12–N4  | 122.2(6) | N3–C7–C8   | 123.1(4) | C8–C7–C12  | 123.9(2)   |
| O2–C12–C7  | 118.9(5) | N3–C7–C12  | 113.3(4) | N1–C1–C2   | 123.0(2)   |
| N4–C12–C7  | 118.9(5) | C8–C7–C12  | 123.5(4) | N1–C1–C6   | 112.9(2)   |
| N3–C7–C8   | 122.6(6) | N1–C1–C2   | 123.1(4) | C2–C1–C6   | 124.2(2)   |
| N3–C7–C12  | 113.5(5) | N1–C1–C6   | 112.5(4) | C1–C2–C3   | 118.5(3)   |
| C8–C7–C12  | 123.9(5) | C2–C1–C6   | 124.4(4) | C9–C10–C11 | 118.4(3)   |
| N3–C11–C10 | 123.2(6) | N3–C11–C10 | 122.4(5) | O1–C6–N2   | 121.6(3)   |

|               |           |               |           |               |           |
|---------------|-----------|---------------|-----------|---------------|-----------|
| C7-C8-C9      | 118.8(6)  | N1-C5-C4      | 123.9(4)  | O1-C6-C1      | 118.6(2)  |
| N1-C5-C4      | 123.1(5)  | C1-C2-C3      | 118.8(4)  | N2-C6-C1      | 119.8(2)  |
| C5-C4-C3      | 119.3(6)  | C9-C10-C11    | 119.7(4)  | C3-C4-C5      | 119.0(3)  |
| C1-C2-C3      | 118.8(5)  | C7-C8-C9      | 118.3(4)  | C9-C8-C7      | 119.0(3)  |
| C10-C9-C8     | 119.0(6)  | C2-C3-C4      | 118.8(5)  | N3-C11-C10    | 123.6(3)  |
| C4-C3-C2      | 118.2(6)  | C10-C9-C8     | 118.7(4)  | C8-C9-C10     | 118.8(3)  |
| C9-C10-C11    | 118.4(6)  | C5-C4-C3      | 118.2(4)  | C4-C3-C2      | 118.9(3)  |
| C5-N1-C1-C2   | 4.6(8)    | C11-N3-C7-C8  | 3.6(6)    | C1-N1-C5-C4   | 2.8(4)    |
| C5-N1-C1-C6   | -176.1(5) | C11-N3-C7-C12 | -176.3(4) | C11-N3-C7-C8  | -3.8(4)   |
| O1-C6-C1-N1   | -0.9(8)   | O2-C12-C7-N3  | -2.1(6)   | C11-N3-C7-C12 | 174.8(2)  |
| N2-C6-C1-N1   | 178.1(5)  | N4-C12-C7-N3  | 177.5(4)  | O2-C12-C7-N3  | 1.9(3)    |
| O1-C6-C1-C2   | 178.4(6)  | O2-C12-C7-C8  | 178.0(4)  | N4-C12-C7-N3  | -176.9(2) |
| N2-C6-C1-C2   | -2.6(9)   | N4-C12-C7-C8  | -2.4(6)   | O2-C12-C7-C8  | -179.6(3) |
| C11-N3-C7-C8  | 2.7(9)    | C5-N1-C1-C2   | 3.1(6)    | N4-C12-C7-C8  | 1.6(4)    |
| C11-N3-C7-C12 | -175.4(5) | C5-N1-C1-C6   | -174.7(4) | C5-N1-C1-C2   | -3.8(4)   |
| O2-C12-C7-N3  | -1.6(8)   | O1-C6-C1-N1   | -2.4(6)   | C5-N1-C1-C6   | 176.3(2)  |
| N4-C12-C7-N3  | 176.8(5)  | N2-C6-C1-N1   | 176.7(4)  | N1-C1-C2-C3   | 1.3(4)    |
| O2-C12-C7-C8  | -179.7(6) | O1-C6-C1-C2   | 179.8(4)  | C6-C1-C2-C3   | -178.8(2) |
| N4-C12-C7-C8  | -1.3(9)   | N2-C6-C1-C2   | -1.1(7)   | N1-C1-C6-O1   | 2.1(3)    |
| C7-N3-C11-C10 | -0.4(9)   | C7-N3-C11-C10 | -2.4(6)   | C2-C1-C6-O1   | -177.8(2) |
| N3-C7-C8-C9   | -1.5(9)   | C1-N1-C5-C4   | -1.2(7)   | N1-C1-C6-N2   | -177.2(2) |
| C12-C7-C8-C9  | 176.4(6)  | N1-C1-C2-C3   | -1.3(7)   | C2-C1-C6-N2   | 2.9(4)    |
| C1-N1-C5-C4   | -3.6(9)   | C6-C1-C2-C3   | 176.2(4)  | N1-C5-C4-C3   | 0.8(4)    |
| N1-C5-C4-C3   | 0.0(10)   | N3-C11-C10-C9 | -0.9(7)   | N3-C7-C8-C9   | 1.7(4)    |
| N1-C1-C2-C3   | -1.9(9)   | N3-C7-C8-C9   | -1.3(6)   | C12-C7-C8-C9  | -176.6(3) |
| C6-C1-C2-C3   | 178.8(6)  | C12-C7-C8-C9  | 178.5(4)  | C7-N3-C11-C10 | 2.3(4)    |
| C7-C8-C9-C10  | -2.1(9)   | C1-C2-C3-C4   | -2.4(7)   | C9-C10-C11-N3 | 1.1(5)    |

|               |          |               |         |               |         |
|---------------|----------|---------------|---------|---------------|---------|
| C5-C4-C3-C2   | 2.7(9)   | C11-C10-C9-C8 | 3.1(7)  | C7-C8-C9-C10  | 1.8(4)  |
| C1-C2-C3-C4   | -1.8(9)  | C7-C8-C9-C10  | -2.1(7) | C11-C10-C9-C8 | -3.2(4) |
| C8-C9-C10-C11 | 4.3(9)   | N1-C5-C4-C3   | -2.4(7) | C5-C4-C3-C2   | -3.4(4) |
| N3-C11-C10-C9 | -3.2(10) | C2-C3-C4-C5   | 4.1(7)  | C1-C2-C3-C4   | 2.4(4)  |

|        | Sm-pa    |        | Eu-pa    |        | Gd-pa    |
|--------|----------|--------|----------|--------|----------|
| Sm1-O1 | 2.370(7) | Eu1-O2 | 2.371(3) | Gd1-O2 | 2.362(3) |
| Sm1-O2 | 2.396(7) | Eu1-O1 | 2.393(3) | Gd1-O1 | 2.390(4) |
| Sm1-O6 | 2.437(8) | Eu1-O5 | 2.424(3) | Gd1-O7 | 2.411(3) |
| Sm1-O4 | 2.439(8) | Eu1-O6 | 2.438(3) | Gd1-O4 | 2.421(3) |
| Sm1-O7 | 2.468(8) | Eu1-O7 | 2.455(3) | Gd1-O6 | 2.448(4) |
| Sm1-O3 | 2.492(7) | Eu1-O3 | 2.472(3) | Gd1-O5 | 2.458(3) |
| Sm1-O5 | 2.520(7) | Eu1-O4 | 2.497(4) | Gd1-O3 | 2.487(4) |
| Sm1-N1 | 2.618(9) | Eu1-N3 | 2.615(4) | Gd1-N3 | 2.606(4) |
| Sm1-N3 | 2.654(9) | Eu1-N1 | 2.644(4) | Gd1-N1 | 2.631(4) |

|           |           |           |          |            |          |
|-----------|-----------|-----------|----------|------------|----------|
| C7-N3-C11 | 117.1(9)  | C5-N1-C1  | 117.5(4) | C5-N1-C1   | 116.6(4) |
| C5-N1-C1  | 117.4(9)  | C11-N3-C7 | 117.3(4) | N3-C11-C10 | 123.6(5) |
| O2-C12-N4 | 123.0(10) | O1-C6-N2  | 121.7(4) | O1-C6-N2   | 121.5(5) |
| O2-C12-C7 | 118.8(9)  | O1-C6-C1  | 118.9(4) | O1-C6-C1   | 119.4(4) |
| N4-C12-C7 | 118.1(9)  | N2-C6-C1  | 119.3(4) | N2-C6-C1   | 119.1(5) |
| O1-C6-N2  | 123.0(11) | O2-C12-N4 | 121.9(4) | N1-C1-C2   | 122.9(5) |
| O1-C6-C1  | 118.3(10) | O2-C12-C7 | 118.6(4) | N1-C1-C6   | 112.8(4) |
| N2-C6-C1  | 118.7(9)  | N4-C12-C7 | 119.5(4) | C2-C1-C6   | 124.3(4) |
| N1-C1-C2  | 122.6(10) | N3-C7-C8  | 123.0(4) | C11-N3-C7  | 117.4(4) |
| N1-C1-C6  | 112.7(9)  | N3-C7-C12 | 112.6(4) | C3-C2-C1   | 118.7(5) |
| C2-C1-C6  | 124.6(9)  | C8-C7-C12 | 124.4(4) | N3-C7-C8   | 122.3(4) |
| N3-C7-C8  | 122.3(10) | N1-C1-C2  | 122.6(4) | N3-C7-C12  | 113.3(4) |

|               |           |               |           |                |           |
|---------------|-----------|---------------|-----------|----------------|-----------|
| N3-C7-C12     | 112.7(9)  | N1-C1-C6      | 113.3(4)  | C8-C7-C12      | 124.4(4)  |
| C8-C7-C12     | 124.9(10) | C2-C1-C6      | 124.1(4)  | O2-C12-N4      | 122.0(5)  |
| C3-C2-C1      | 119.1(10) | C3-C2-C1      | 118.7(4)  | O2-C12-C7      | 118.1(5)  |
| C9-C8-C7      | 120.2(10) | N3-C11-C10    | 123.2(4)  | N4-C12-C7      | 120.0(5)  |
| N1-C5-C4      | 123.0(10) | N1-C5-C4      | 123.9(4)  | C9-C10-C11     | 118.6(5)  |
| C8-C9-C10     | 118.4(10) | C7-C8-C9      | 118.7(4)  | N1-C5-C4       | 123.8(5)  |
| C3-C4-C5      | 118.8(10) | C2-C3-C4      | 119.1(4)  | C3-C4-C5       | 119.0(5)  |
| N3-C11-C10    | 123.8(10) | C9-C10-C11    | 118.9(4)  | C9-C8-C7       | 118.8(5)  |
| C9-C10-C11    | 117.9(11) | C10-C9-C8     | 118.8(4)  | C4-C3-C2       | 118.8(5)  |
| C4-C3-C2      | 118.8(10) | C5-C4-C3      | 118.2(4)  | C10-C9-C8      | 119.1(5)  |
| C5-N1-C1-C2   | 3.9(15)   | C11-N3-C7-C8  | 3.7(6)    | C5-N1-C1-C6    | 175.4(4)  |
| C5-N1-C1-C6   | -176.6(9) | C11-N3-C7-C12 | -175.6(4) | O1-C6-C1-N1    | 1.4(6)    |
| O2-C6-C1-N1   | -2.0(14)  | O2-C12-C7-N3  | -3.3(6)   | N2-C6-C1-N1    | -175.7(4) |
| N2-C6-C1-N1   | 176.6(10) | N4-C12-C7-N3  | 176.5(4)  | O1-C6-C1-C2    | -179.5(5) |
| O1-C6-C1-C2   | 177.5(10) | O2-C12-C7-C8  | 177.4(4)  | N2-C6-C1-C2    | 3.5(7)    |
| N2-C6-C1-C2   | -3.8(16)  | N4-C12-C7-C8  | -2.8(7)   | C10-C11-N3-C7  | 1.9(7)    |
| C11-N3-C7-C8  | 3.9(15)   | C5-N1-C1-C2   | 4.3(7)    | C10-C11-N3-Gd1 | -173.1(4) |
| C11-N3-C7-C12 | -174.7(9) | C5-N1-C1-C6   | -175.0(4) | N1-C1-C2-C3    | 2.0(7)    |
| O2-C12-C7-N3  | -1.8(14)  | O1-C6-C1-N1   | -1.3(6)   | C6-C1-C2-C3    | -177.1(5) |
| N4-C12-C7-N3  | 176.5(10) | N2-C6-C1-N1   | 176.0(4)  | C11-N3-C7-C8   | -3.1(7)   |
| O2-C12-C7-C8  | 179.6(10) | O1-C6-C1-C2   | 179.5(4)  | C11-N3-C7-C12  | 176.0(4)  |
| N4-C12-C7-C8  | -2.1(16)  | N2-C6-C1-C2   | -3.2(7)   | N3-C7-C12-O2   | 3.3(6)    |
| N1-C1-C2-C3   | -0.7(16)  | N1-C1-C2-C3   | -2.4(7)   | C8-C7-C12-O2   | -177.5(5) |
| C6-C1-C2-C3   | 179.8(10) | C6-C1-C2-C3   | 176.8(4)  | N3-C7-C12-N4   | -176.4(4) |
| N3-C7-C8-C9   | -1.9(16)  | C7-N3-C11-C10 | -2.9(7)   | C8-C7-C12-N4   | 2.8(7)    |
| C12-C7-C8-C9  | 176.6(10) | C1-N1-C5-C4   | -2.2(7)   | N3-C11-C10-C9  | 1.9(8)    |
| C1-N1-C5-C4   | -3.1(16)  | N3-C7-C8-C9   | -1.0(7)   | C1-N1-C5-C4    | 2.2(8)    |

|               |          |               |          |               |           |
|---------------|----------|---------------|----------|---------------|-----------|
| C7-C8-C9-C10  | -2.2(17) | C12-C7-C8-C9  | 178.2(4) | N1-C5-C4-C3   | 1.4(8)    |
| N1-C5-C4-C3   | -0.8(17) | C1-C2-C3-C4   | -1.7(7)  | N3-C7-C8-C9   | 0.5(7)    |
| C7-N3-C11-C10 | -2.1(17) | N3-C11-C10-C9 | -0.7(7)  | C12-C7-C8-C9  | -178.5(4) |
| C8-C9-C10-C11 | 3.9(17)  | C11-C10-C9-C8 | 3.4(7)   | C5-C4-C3-C2   | -3.3(8)   |
| N3-C11-C10-C9 | -1.8(18) | C7-C8-C9-C10  | -2.6(7)  | C1-C2-C3-C4   | 1.7(7)    |
| C5-C4-C3-C2   | 4.0(16)  | N1-C5-C4-C3   | -1.8(8)  | C11-C10-C9-C8 | -4.5(7)   |
| C1-C2-C3-C4   | -3.3(16) | C2-C3-C4-C5   | 3.7(7)   | C7-C8-C9-C10  | 3.4(7)    |

|           | Tb-pa    |           | Er-pa    |            | PrBr <sub>3</sub> -pa |
|-----------|----------|-----------|----------|------------|-----------------------|
| Tb1-O2    | 2.343(6) | Er1-O2    | 2.263(2) | Pr1-O1     | 2.421(7)              |
| Tb1-O1    | 2.356(6) | Er1-O1    | 2.268(2) | Pr1-O2     | 2.432(7)              |
| Tb1-O5    | 2.401(6) | Er1-O3    | 2.332(2) | Pr1-O6     | 2.486(7)              |
| Tb1-O7    | 2.406(7) | Er1-O5    | 2.337(3) | Pr1-O5     | 2.492(7)              |
| Tb1-O6    | 2.421(7) | Er1-O4    | 2.367(3) | Pr1-O7     | 2.520(8)              |
| Tb1-O3    | 2.449(6) | Er1-O6    | 2.376(2) | Pr1-O3     | 2.525(7)              |
| Tb1-O4    | 2.496(6) | Er1-N3    | 2.498(3) | Pr1-O4     | 2.566(7)              |
| Tb1-N3    | 2.581(7) | Er1-N1    | 2.514(3) | Pr1-N3     | 2.709(7)              |
| Tb1-N1    | 2.618(8) |           |          | Pr1-N1     | 2.725(8)              |
| C5-N1-C1  | 117.9(8) | C5-N1-C1  | 117.8(3) | C11-N3-C7  | 119.7(8)              |
| C11-N3-C7 | 117.8(8) | C11-N3-C7 | 117.6(3) | C5-N1-C1   | 117.2(9)              |
| O2-C12-N4 | 123.0(8) | N1-C5-C4  | 122.4(3) | O1-C6-N2   | 121.5(10)             |
| O2-C12-C7 | 117.6(8) | N1-C1-C2  | 122.7(3) | O1-C6-C1   | 119.5(8)              |
| N4-C12-C7 | 119.3(8) | N1-C1-C6  | 113.0(3) | N2-C6-C1   | 119.0(9)              |
| O1-C6-N2  | 122.9(8) | C2-C1-C6  | 124.3(3) | N3-C11-C10 | 120.8(10)             |
| O1-C6-C1  | 118.7(8) | N3-C7-C8  | 123.2(3) | N3-C7-C8   | 121.4(9)              |
| N2-C6-C1  | 118.4(8) | N3-C7-C12 | 112.7(3) | N3-C7-C12  | 114.3(8)              |
| N3-C7-C8  | 122.2(8) | C8-C7-C12 | 124.1(3) | C8-C7-C12  | 124.2(9)              |

|               |           |               |           |               |            |
|---------------|-----------|---------------|-----------|---------------|------------|
| N3-C7-C12     | 112.7(7)  | O2-C12-N4     | 122.1(3)  | O2-C12-N4     | 119.5(9)   |
| C8-C7-C12     | 125.1(8)  | O2-C12-C7     | 118.2(3)  | O2-C12-C7     | 119.1(9)   |
| N1-C1-C2      | 122.7(8)  | N4-C12-C7     | 119.7(3)  | N4-C12-C7     | 121.4(9)   |
| N1-C1-C6      | 113.2(8)  | C7-C8-C9      | 118.1(3)  | N1-C5-C4      | 122.2(10)  |
| C2-C1-C6      | 124.1(8)  | C3-C4-C5      | 119.1(3)  | C2-C1-N1      | 122.1(10)  |
| N3-C11-C10    | 122.1(9)  | C3-C2-C1      | 119.2(3)  | C2-C1-C6      | 125.6(9)   |
| N1-C5-C4      | 123.6(9)  | O1-C6-N2      | 120.7(3)  | N1-C1-C6      | 112.3(8)   |
| C3-C2-C1      | 118.0(9)  | O1-C6-C1      | 118.9(3)  | C9-C10-C11    | 119.7(10)  |
| C8-C9-C10     | 118.3(8)  | N2-C6-C1      | 120.4(3)  | C10-C9-C8     | 119.6(9)   |
| C9-C8-C7      | 120.1(9)  | N3-C11-C10    | 122.8(3)  | C9-C8-C7      | 118.5(10)  |
| C9-C10-C11    | 119.1(8)  | C10-C9-C8     | 119.6(3)  | C4-C3-C2      | 118.5(11)  |
| C2-C3-C4      | 119.5(9)  | C9-C10-C11    | 118.6(3)  | C1-C2-C3      | 120.2(11)  |
| C3-C4-C5      | 118.1(9)  | C2-C3-C4      | 118.8(3)  | C3-C4-C5      | 119.7(11)  |
| C11-N3-C7-C8  | 4.8(13)   | C1-N1-C5-C4   | -0.3(5)   | C7-N3-C11-C10 | 0.9(16)    |
| C11-N3-C7-C12 | -175.8(8) | C5-N1-C1-C2   | -1.6(5)   | C11-N3-C7-C8  | -2.0(15)   |
| O2-C12-C7-N3  | -1.6(12)  | C5-N1-C1-C6   | 177.9(3)  | C11-N3-C7-C12 | 174.5(9)   |
| N4-C12-C7-N3  | 176.2(8)  | C11-N3-C7-C8  | 0.7(5)    | N3-C7-C12-O2  | 5.3(13)    |
| O2-C12-C7-C8  | 177.7(9)  | C11-N3-C7-C12 | -177.3(3) | C8-C7-C12-O2  | -178.3(10) |
| N4-C12-C7-C8  | -4.4(14)  | N3-C7-C12-O2  | 6.5(4)    | N3-C7-C12-N4  | -174.7(10) |
| C5-N1-C1-C2   | 5.7(14)   | C8-C7-C12-O2  | -171.5(3) | C8-C7-C12-N4  | 1.7(16)    |
| C5-N1-C1-C6   | -174.6(8) | N3-C7-C12-N4  | -174.1(3) | C1-N1-C5-C4   | 1.7(16)    |
| O1-C6-C1-N1   | -2.3(12)  | C8-C7-C12-N4  | 7.9(5)    | C5-N1-C1-C2   | -3.6(15)   |
| N2-C6-C1-N1   | 176.2(9)  | N3-C7-C8-C9   | -0.8(5)   | C5-N1-C1-C6   | 174.9(9)   |
| O1-C6-C1-C2   | 177.4(9)  | C12-C7-C8-C9  | 177.0(3)  | O1-C6-C1-C2   | -179.8(11) |
| N2-C6-C1-C2   | -4.1(14)  | N1-C5-C4-C3   | 2.2(5)    | N2-C6-C1-C2   | 0.9(17)    |
| C7-N3-C11-C10 | -3.5(13)  | N1-C1-C2-C3   | 1.6(5)    | O1-C6-C1-N1   | 1.8(14)    |
| C1-N1-C5-C4   | -3.2(14)  | C6-C1-C2-C3   | -177.9(3) | N2-C6-C1-N1   | -177.6(10) |



|               |          |               |           |               |            |
|---------------|----------|---------------|-----------|---------------|------------|
| N1-C1-C2-C3   | -3.4(14) | N1-C1-C6-O1   | 7.8(4)    | N3-C11-C10-C9 | 2.5(17)    |
| C6-C1-C2-C3   | 176.9(9) | C2-C1-C6-O1   | -172.7(3) | C11-C10-C9-C8 | -4.8(17)   |
| C10-C9-C8-C7  | -3.9(14) | N1-C1-C6-N2   | -170.3(3) | C10-C9-C8-C7  | 3.7(16)    |
| N3-C7-C8-C9   | -1.1(14) | C2-C1-C6-N2   | 9.2(5)    | N3-C7-C8-C9   | -0.3(16)   |
| C12-C7-C8-C9  | 179.6(9) | C7-N3-C11-C10 | 0.3(5)    | C12-C7-C8-C9  | -176.5(10) |
| C8-C9-C10-C11 | 5.1(14)  | C7-C8-C9-C10  | -0.2(5)   | N1-C1-C2-C3   | 2.9(17)    |
| N3-C11-C10-C9 | -1.4(14) | C8-C9-C10-C11 | 1.1(6)    | C6-C1-C2-C3   | -175.4(10) |
| C1-C2-C3-C4   | -1.4(14) | N3-C11-C10-C9 | -1.2(6)   | C4-C3-C2-C1   | -0.2(18)   |
| C2-C3-C4-C5   | 3.8(14)  | C1-C2-C3-C4   | 0.4(6)    | C2-C3-C4-C5   | -1.6(19)   |
| N1-C5-C4-C3   | -1.5(15) | C5-C4-C3-C2   | -2.2(6)   | N1-C5-C4-C3   | 0.9(19)    |
| NdN-pa        |          |               |           |               |            |
| Nd1-O3        | 2.427(3) |               |           |               |            |
| Nd1-O2        | 2.439(3) | C5-N1-C1-C2   | -1.2(6)   | C5-N1-C1      | 117.4(4)   |
| Nd1-O1        | 2.458(3) | N1-C1-C2-C3   | 0.3(7)    | C7-N3-C11     | 117.2(4)   |
| Nd1-O7        | 2.541(3) | C1-C2-C3-C4   | 0.3(7)    | C13-N5-C17    | 116.8(4)   |
| Nd1-O5        | 2.586(3) | C2-C3-C4-C5   | -0.2(7)   | O6-N7-O4      | 121.3(4)   |
| Nd1-O8        | 2.591(3) | C1-N1-C5-C4   | 1.4(6)    | O6-N7-O5      | 120.4(4)   |
| Nd1-O4        | 2.641(3) | C1-N1-C5-C6   | -179.0(4) | O4-N7-O5      | 118.3(3)   |
| Nd1-N1        | 2.664(4) | C3-C4-C5-N1   | -0.7(6)   | O9-N8-O8      | 122.2(4)   |
| Nd1-N5        | 2.678(4) | C3-C4-C5-C6   | 179.7(4)  | O9-N8-O7      | 121.4(4)   |
| Nd1-N3        | 2.688(4) | N1-C5-C6-O1   | -11.8(5)  | O8-N8-O7      | 116.4(3)   |
|               |          | C4-C5-C6-O1   | 167.9(4)  | C19-N9-C23    | 116.8(4)   |
|               |          | N1-C5-C6-N2   | 167.4(4)  | C3-C2-C1      | 119.2(4)   |
| C8-C9-C10-C11 | 1.7(6)   | C4-C5-C6-N2   | -13.0(6)  | C2-C3-C4      | 119.0(4)   |
| C7-N3-C11-C10 | -2.7(6)  | C11-N3-C7-C8  | 2.8(6)    | C5-C4-C3      | 118.2(4)   |
| C7-N3-C11-C12 | 178.9(4) | N3-C7-C8-C9   | -0.7(7)   | N1-C5-C4      | 123.2(4)   |
| C9-C10-C11-N3 | 0.5(6)   | C7-C8-C9-C10  | -1.6(7)   | N1-C5-C6      | 113.4(4)   |

|                 |           |                 |           |             |          |
|-----------------|-----------|-----------------|-----------|-------------|----------|
| C9-C10-C11-C12  | 178.7(4)  | N5-C17-C18-N6   | 164.8(4)  | C4-C5-C6    | 123.4(4) |
| N3-C11-C12-O2   | 24.6(5)   | C16-C17-C18-N6  | -15.8(6)  | O1-C6-N2    | 122.4(4) |
| C10-C11-C12-O2  | -153.7(4) | C23-N9-C19-C20  | 1.4(7)    | O1-C6-C5    | 118.7(4) |
| N3-C11-C12-N4   | -154.5(4) | N9-C19-C20-C21  | -0.5(8)   | N2-C6-C5    | 118.9(4) |
| C10-C11-C12-N4  | 27.1(6)   | C19-C20-C21-C22 | -0.3(8)   | N3-C7-C8    | 122.6(4) |
| C17-N5-C13-C14  | -0.8(6)   | C20-C21-C22-C23 | 0.2(8)    | C9-C8-C7    | 119.1(4) |
| N5-C13-C14-C15  | -1.4(7)   | C19-N9-C23-C22  | -1.5(7)   | C10-C9-C8   | 118.7(4) |
| C13-C14-C15-C16 | 2.7(7)    | C19-N9-C23-C24  | 177.0(4)  | C9-C10-C11  | 118.9(4) |
| C14-C15-C16-C17 | -1.8(7)   | C21-C22-C23-N9  | 0.8(7)    | N3-C11-C10  | 123.3(4) |
| C13-N5-C17-C16  | 1.7(6)    | C21-C22-C23-C24 | -177.6(5) | N3-C11-C12  | 111.9(3) |
| C13-N5-C17-C18  | -178.9(4) | N9-C23-C24-O10  | -162.7(4) | C10-C11-C12 | 124.7(4) |
| C15-C16-C17-N5  | -0.5(6)   | C22-C23-C24-O10 | 15.8(7)   | O2-C12-N4   | 122.5(4) |
| C15-C16-C17-C18 | -179.8(4) | N9-C23-C24-N10  | 16.3(6)   | O2-C12-C11  | 119.3(4) |
| N5-C17-C18-O3   | -13.2(5)  | C22-C23-C24-N10 | -165.2(4) | N4-C12-C11  | 118.2(4) |
| C16-C17-C18-O3  | 166.2(4)  |                 |           | N5-C13-C14  | 123.8(4) |
|                 |           |                 |           | C15-C14-C13 | 118.4(4) |
| C16-C17-C18     | 124.2(4)  | N6-C18-C17      | 118.3(4)  | C14-C15-C16 | 119.3(4) |
| O3-C18-N6       | 122.3(4)  | N9-C19-C20      | 124.4(5)  | C17-C16-C15 | 118.5(4) |
| O3-C18-C17      | 119.4(4)  | C19-C20-C21     | 118.6(5)  | N5-C17-C16  | 123.1(4) |
| O10-C24-N10     | 123.1(4)  | C20-C21-C22     | 118.2(5)  | N5-C17-C18  | 112.6(3) |
| O10-C24-C23     | 120.4(4)  | C23-C22-C21     | 119.2(5)  | N9-C23-C22  | 122.7(4) |
| N10-C24-C23     | 116.6(4)  | C22-C23-C24     | 121.2(4)  | N9-C23-C24  | 116.1(4) |

---

**Table S2** The IR bands and possible assignments for lanthanide-pa complexes in the 4000–650 cm<sup>-1</sup> region

| Pa   | La   | Pr   | Nd   | Sm   | Eu   | Gd   | Tb   | Er   | PrBr | NdN  | Possible assignments |
|------|------|------|------|------|------|------|------|------|------|------|----------------------|
| 3420 |      |      |      |      |      |      |      | 3469 | 3380 | 3384 |                      |
|      | 3304 | 3304 | 3307 | 3346 | 3312 | 3312 | 3346 | 3351 | 3354 | 3357 |                      |
| 3277 |      |      |      |      |      |      |      |      | 3299 | 3288 | v(NH <sub>2</sub> )  |
|      | 3212 | 3213 | 3214 | 3238 | 3215 | 3217 | 3219 |      | 3214 |      |                      |
| 3187 | 3188 | 3190 | 3190 |      | 3191 | 3193 |      | 3184 | 3180 | 3181 |                      |
|      |      |      | 3156 |      |      |      |      |      | 3169 |      |                      |
|      |      |      | 3143 |      |      |      |      |      |      |      |                      |
| 3061 |      |      |      |      |      |      |      |      |      | 3092 | v(CH)                |
|      |      |      |      |      |      |      | 2925 |      |      |      |                      |
|      |      |      |      |      |      |      | 2854 |      |      |      |                      |
|      |      |      |      |      |      |      |      | 2791 |      |      |                      |
| 2752 | 2752 | 2749 |      |      |      |      |      | 2769 |      |      |                      |
| 1662 | 1665 | 1665 | 1665 | 1666 | 1666 | 1667 | 1667 | 1681 | 1660 | 1675 | v(CO)                |
|      |      |      | 1621 | 1637 | 1626 | 1629 | 1632 | 1616 | 1610 | 1615 |                      |
| 1605 | 1613 | 1613 | 1613 |      | 1614 | 1614 | 1616 |      |      |      | NH <sub>2</sub> scis |
| 1588 | 1583 | 1583 | 1583 | 1584 | 1585 | 1585 | 1585 | 1581 | 1581 | 1583 | vring                |
| 1569 | 1568 | 1568 | 1568 | 1568 | 1569 | 1569 | 1569 | 1567 | 1568 | 1569 | vring                |
| 1469 | 1491 | 1492 | 1493 | 1493 | 1493 | 1494 | 1494 | 1505 | 1492 | 1493 | δCH                  |
|      |      |      |      |      |      |      |      |      |      | 1482 |                      |
|      |      |      |      | 1448 |      |      | 1451 | 1455 | 1450 | 1445 |                      |
| 1444 | 1434 | 1435 | 1436 | 1436 | 1436 | 1437 | 1438 | 1433 | 1434 | 1432 | δCH                  |
| 1393 |      |      |      | 1410 |      |      |      |      |      | 1410 | v(CN)                |
|      |      |      |      |      |      |      |      |      |      | 1346 |                      |
|      |      |      |      |      |      |      |      |      |      | 1327 |                      |

|      |      |      |      |      |      |      |      |      |      |      |               |             |
|------|------|------|------|------|------|------|------|------|------|------|---------------|-------------|
| 1285 | 1309 | 1309 | 1309 | 1309 | 1309 | 1309 | 1309 | 1309 | 1308 | 1308 | 1296          | $\delta$ CH |
| 1254 | 1260 | 1261 | 1261 | 1261 | 1261 | 1261 | 1261 | 1264 | 1260 | 1259 | vring         |             |
| 1226 | 1221 | 1222 | 1222 | 1222 | 1223 | 1223 | 1224 | 1225 | 1217 | 1223 |               |             |
| 1166 | 1163 | 1182 | 1182 | 1182 | 1183 | 1183 | 1184 | 1180 |      | 1178 |               |             |
|      | 1164 | 1164 | 1164 | 1164 | 1165 | 1165 | 1165 | 1159 | 1164 | 1158 | vring         |             |
|      |      |      |      |      |      | 1122 | 1123 |      |      |      |               |             |
| 1144 | 1118 | 1119 | 1120 | 1121 | 1119 | 1119 | 1118 | 1119 | 1119 | 1116 | $\delta$ CH   |             |
|      |      | 1093 | 1094 | 1095 | 1095 | 1096 | 1097 | 1095 | 1092 | 1091 | $\delta$ CH   |             |
| 1097 | 1081 | 1081 | 1082 | 1082 | 1082 | 1082 | 1082 |      | 1076 | 1055 | NH2rock       |             |
| 1044 | 1055 | 1056 | 1056 | 1056 | 1057 | 1057 | 1057 | 1055 | 1056 | 1049 | vring         |             |
|      |      |      |      |      |      |      |      |      |      | 1040 |               |             |
| 997  | 1009 | 1010 | 1011 | 1011 | 1012 | 1012 | 1012 | 1013 | 1009 | 1009 | $\gamma$ (CH) |             |
|      |      |      |      |      |      |      |      |      |      | 997  | vring         |             |
|      |      |      |      |      |      |      |      |      |      | 977  |               |             |
| 909  | 907  | 907  | 907  | 907  | 907  | 907  | 907  | 911  | 903  | 910  | $\gamma$ (CH) |             |
|      |      |      |      |      |      |      |      |      |      | 829  |               |             |
| 826  | 820  | 820  | 820  | 820  | 820  | 820  | 820  | 825  | 818  | 816  | $\gamma$ (CH) |             |
| 797  | 785  | 786  | 787  | 787  | 788  | 788  | 789  | 794  | 784  | 784  | $\delta$ ring |             |
| 771  |      |      |      |      |      |      |      | 786  |      | 762  |               |             |
| 758  | 755  | 756  | 756  | 756  | 757  | 757  | 757  | 758  | 753  | 754  | $\tau$ ring   |             |
|      |      |      |      |      |      |      |      |      |      | 744  |               |             |
|      |      |      | 727  |      |      |      |      | 727  | 720  | 712  |               |             |
| 695  |      |      |      |      |      | 672  |      | 691  |      |      | $\gamma$ (CO) |             |
| 649  | 654  | 656  | 658  | 657  | 658  | 659  | 660  | 662  | 656  | 651  |               |             |
| 632  | 632  | 633  | 633  | 632  | 633  | 633  | 633  | 634  | 633  | 630  |               |             |
| 611  | 612  | 614  | 614  | 616  | 614  | 613  | 614  |      |      | 616  |               |             |

**Table S3** The band positions in the Raman spectra of the lanthanide-pa complexes in the 3700–100 cm<sup>-1</sup> region

| Pa   | La   | Pr   | Nd   | Sm   | Eu   | Gd   | Tb   | Er   | PrBr | NdN  |
|------|------|------|------|------|------|------|------|------|------|------|
|      | 3363 | 3375 | 3302 | 3386 | 3308 | 3296 | 3296 |      | 3380 |      |
|      | 3193 |      |      | 3192 | 3193 |      |      | 3140 |      |      |
|      | 3144 |      |      |      | 3143 | 3144 | 3144 | 3085 |      |      |
| 3064 | 3072 | 3068 | 3078 | 3072 | 3078 | 3078 | 3080 | 3074 | 3065 | 3078 |
|      | 3063 |      | 3063 |      | 3063 | 3064 | 3066 | 3059 |      |      |
|      | 2994 |      |      |      | 2992 | 2992 | 2994 |      |      |      |
|      | 2882 |      |      |      |      |      |      |      |      |      |
|      |      |      | 2110 |      |      |      |      |      |      | 2185 |
|      |      |      | 2058 |      |      |      |      |      |      | 2136 |
|      |      |      | 2022 |      |      |      |      |      |      |      |
|      |      |      | 1966 |      |      |      |      |      |      | 1899 |
|      |      |      | 1864 |      |      |      |      |      |      | 1853 |
|      |      |      | 1784 |      |      |      |      |      |      |      |
| 1664 | 1655 | 1654 | 1675 | 1672 | 1676 | 1677 | 1678 | 1695 | 1666 |      |
|      |      |      | 1644 |      |      |      |      | 1644 |      |      |
|      | 1614 | 1608 | 1614 | 1610 | 1614 | 1615 | 1616 | 1608 | 1606 | 1613 |
| 1591 |      |      | 1586 |      | 1586 | 1587 | 1588 |      |      |      |
| 1572 | 1572 | 1572 | 1574 | 1571 | 1574 | 1574 | 1575 | 1570 | 1572 | 1573 |
|      | 1490 | 1487 | 1494 |      | 1494 | 1494 | 1495 | 1498 | 1489 |      |
| 1473 |      |      |      | 1488 |      |      |      | 1454 | 1446 | 1492 |
| 1448 | 1448 | 1444 | 1448 | 1447 | 1449 | 1449 | 1451 | 1434 | 1430 | 1446 |
| 1404 | 1430 | 1427 | 1437 | 1430 | 1437 | 1437 | 1439 |      |      | 1431 |
| 1294 | 1314 | 1308 | 1310 | 1310 | 1310 | 1310 | 1310 | 1308 | 1307 | 1314 |
| 1256 |      | 1261 | 1263 |      | 1263 | 1263 | 1264 | 1265 | 1261 |      |
| 1170 | 1183 | 1176 | 1184 | 1181 | 1184 | 1184 | 1186 | 1182 | 1179 | 1177 |
| 1154 | 1163 | 1160 | 1167 | 1164 | 1166 | 1167 | 1167 | 1161 | 1160 | 1160 |

|      |      |      |      |      |      |      |      |      |      |      |
|------|------|------|------|------|------|------|------|------|------|------|
| 1146 | 1125 | 1111 | 1122 | 1118 | 1123 | 1123 | 1124 | 1123 | 1113 | 1116 |
| 1089 | 1092 |      | 1095 | 1084 | 1096 | 1096 | 1097 | 1096 | 1087 | 1093 |
|      |      | 1082 | 1083 |      | 1083 | 1083 | 1085 |      |      |      |
| 1046 | 1059 | 1052 | 1057 | 1054 | 1056 | 1057 | 1058 | 1057 | 1054 | 1049 |
|      |      |      |      |      |      |      |      |      |      | 1041 |
|      | 1007 | 1007 | 1010 | 1010 | 1010 | 1010 | 1011 | 1011 | 1009 | 1010 |
| 999  |      | 998  |      |      |      |      |      | 1000 |      | 996  |
| 989  |      |      |      |      |      | 975  |      | 991  |      |      |
|      |      | 902  | 907  |      | 907  | 910  | 910  | 910  | 908  |      |
|      |      |      |      |      |      |      |      |      | 857  |      |
| 826  | 823  | 818  | 821  | 810  | 820  | 820  | 821  | 820  | 817  | 820  |
| 781  | 781  | 781  | 787  | 782  | 788  | 788  | 790  | 794  | 782  | 785  |
|      |      |      | 758  |      | 758  | 758  | 760  | 760  |      | 744  |
|      |      |      |      |      |      |      |      | 725  |      | 711  |
|      |      |      |      |      |      |      |      | 665  |      |      |
| 641  | 632  | 631  | 633  | 634  | 633  | 633  | 634  | 634  | 632  | 632  |
| 618  |      |      |      |      |      |      |      |      |      | 615  |
|      |      | 505  |      | 500  | 506  | 506  | 510  | 519  |      |      |
| 499  |      |      | 441  |      | 441  | 441  |      |      |      |      |
| 427  | 426  | 418  | 425  | 423  | 426  | 428  | 430  | 438  | 419  | 419  |
| 406  |      |      |      |      |      | 412  | 413  | 411  |      |      |
|      |      |      |      |      |      |      |      | 361  |      |      |
|      |      |      |      |      | 287  | 278  | 282  | 301  |      |      |
| 246  | 287  |      | 201  | 245  | 201  | 202  | 204  |      | 272  |      |
| 197  |      |      |      |      |      |      |      |      |      |      |
| 180  | 181  |      |      | 179  |      |      |      | 186  |      | 181  |
|      | 147  |      |      |      | 154  | 158  | 161  | 160  |      |      |
| 118  | 120  | 128  | 136  | 124  | 138  | 139  | 141  | 115  | 125  | 126  |
|      | 108  |      | 106  |      | 106  | 105  | 107  |      |      |      |

---

**Table S4** The band positions in the FIR spectra for the lanthanide-pa complexes in the 650–50 cm<sup>-1</sup> region

| Pa  | La  | Pr  | Nd  | Sm  | Eu  | Gd  | Tb  | Er  | PrBr | NdN |
|-----|-----|-----|-----|-----|-----|-----|-----|-----|------|-----|
| 649 | 650 |     |     |     |     |     |     |     |      |     |
| 630 | 632 | 632 | 632 | 632 | 632 | 633 | 632 | 633 | 632  | 629 |
| 609 | 597 | 613 | 613 | 613 | 613 | 613 | 614 |     | 597  | 618 |
|     |     |     |     |     |     |     |     |     | 552  | 533 |
| 519 |     |     |     |     |     |     |     | 521 |      | 519 |
| 420 | 427 | 441 | 441 | 440 | 441 | 439 | 441 |     |      |     |
|     | 416 | 419 | 420 | 421 | 422 | 424 | 425 | 424 | 418  |     |
|     | 403 | 405 | 405 | 406 | 406 | 407 | 407 | 409 | 402  | 409 |
| 385 |     |     |     |     |     |     |     | 366 |      |     |
|     | 293 | 286 | 286 | 287 | 288 | 291 | 292 | 307 | 296  | 285 |
| 252 | 249 | 260 | 265 | 271 | 275 |     |     |     | 281  |     |
|     |     |     |     | 230 | 233 | 237 | 239 |     |      | 250 |
|     | 212 | 218 | 218 | 217 | 217 | 220 | 224 | 220 | 217  | 222 |
|     |     |     |     |     |     |     |     |     |      | 203 |
|     |     |     |     |     |     |     | 183 | 190 |      | 191 |
| 177 | 186 |     |     |     | 161 | 164 | 168 | 159 | 153  | 153 |
|     |     | 142 | 143 | 143 | 143 |     |     | 150 | 138  | 129 |
| 135 | 128 | 133 | 132 |     |     | 137 | 137 | 119 |      | 119 |
|     | 94  | 102 | 104 | 106 |     | 94  | 94  | 83  | 93   | 83  |
| 76  |     |     | 63  | 65  | 67  | 67  | 67  | 70  |      |     |
| 54  |     |     |     |     |     |     |     |     |      |     |

**Table S5** The band positions in the THz spectra of the lanthanide-pa complexes (THz)

| Pa | La   | Pr   | Nd   | Sm   | Eu   | Gd   | Tb   | Er   | PrBr | NdN  |
|----|------|------|------|------|------|------|------|------|------|------|
|    |      | 0.71 | 0.73 |      | 0.73 |      | 0.73 |      |      |      |
|    |      |      |      |      |      |      |      | 1.06 |      |      |
|    |      |      |      |      |      |      |      | 1.40 | 1.56 | 1.58 |
|    | 1.58 |      |      |      |      |      | 1.61 | 1.70 |      |      |
|    | 1.80 | 1.80 | 1.87 |      |      |      |      |      |      | 1.88 |
|    |      |      |      | 1.90 | 1.90 | 1.92 | 1.95 |      | 1.93 |      |
|    | 1.99 | 2.14 | 2.09 | 2.07 |      |      | 2.14 | 2.02 | 2.11 |      |
|    |      |      |      |      |      | 2.31 |      | 2.13 |      |      |
